# Supplementary material for: Combination of Everolimus with Sorafenib for Solid Renal Tumors in Tsc2+/− Mice Is Superior to Everolimus Alone
Source: PubMed Central journal article supplement — Neoplasia. 2017 Jan 13;19(2):112–20. doi: 10.1016/j.neo.2016.12.008 (PMC5238457; doi:10.1016/j.neo.2016.12.008), 2017-01-13
Supplement: mmc1.pdf [file mmc1.pdf]

## Supplemental Table 1 Summary of animal treatment

| Treatment Group        | Number of <i>Tsc2</i> <sup>+/-</sup> mice | Number of males | Number of females | Treatment start age (months) | Treatment end age (months) | Dosage* ( 5 times a week) | Number of animals killed due to sickness before end of treatment** |
|------------------------|-------------------------------------------|-----------------|-------------------|------------------------------|----------------------------|---------------------------|--------------------------------------------------------------------|
| Vehicle                | 10                                        | 5               | 5                 | 11                           | 13                         | 5 ml/kg                   | 0                                                                  |
| Everolimus             | 10                                        | 5               | 5                 | 11                           | 13                         | 10 mg/kg                  | 0                                                                  |
| Sorafenib              | 10                                        | 5               | 5                 | 11                           | 13                         | 42 mg/kg                  | 0                                                                  |
| Everolimus + Sorafenib | 10                                        | 5               | 5                 | 11                           | 13                         | 6 mg/kg + 30 mg/kg        | 3                                                                  |

\* Everolimus and sorafenib were given via gavage.

\*\* These animals ( 2 females and 1 male) euthanised due to significant loss of body weight within the first month of treatment were excluded from final analysis.
