# Supplementary material for: Combination of Everolimus with Sorafenib for Solid Renal Tumors in Tsc2+/− Mice Is Superior to Everolimus Alone
Source: PubMed Central journal article supplement — Neoplasia. 2017 Jan 13;19(2):112–20. doi: 10.1016/j.neo.2016.12.008 (PMC5238457; doi:10.1016/j.neo.2016.12.008), 2017-01-13
Supplement: mmc2.pdf [file mmc2.pdf]

**Supplemental Table 2 Comparison of tumour burden in *Tsc2*<sup>+/-</sup> mice by histological analysis**

(Wilcoxon rank-sum test)

## A. Lesion number (all lesions)

| Treatment*             | Number of mice | Median | Range   | Z (P) (compared with Vehicle) | Z (P) (compared with Everolimus+Sorafenib) |
|------------------------|----------------|--------|---------|-------------------------------|--------------------------------------------|
| Vehicle                | 10             | 60.0   | 36 - 69 |                               |                                            |
| Everolimus             | 10             | 28.5   | 21 - 53 | 3.33 (0.001)                  | 0.49(0.600)                                |
| Sorafenib              | 10             | 53.5   | 28 - 73 | 1.14 (0.260)                  | 2.88 (0.004)                               |
| Everolimus + Sorafenib | 7              | 28.0   | 14 - 40 | 3.32 (0.001)                  |                                            |

## B. Lesion size (all lesions)

| Treatment*             | Number of mice | Median (mm <sup>2</sup> ) | Range (mm <sup>2</sup> ) | Z (P) (compared with Vehicle) | Z (P) (compared with Everolimus+Sorafenib) |
|------------------------|----------------|---------------------------|--------------------------|-------------------------------|--------------------------------------------|
| Vehicle                | 10             | 26.820                    | 14.552 - 56.238          |                               |                                            |
| Everolimus             | 10             | 14.095                    | 3.629 - 30.352           | 3.10 (0.002)                  | 1.37 (0.170)                               |
| Sorafenib              | 10             | 21.854                    | 7.209 - 46.884           | 0.83 (0.410)                  | 2.64 (0.008)                               |
| Everolimus + Sorafenib | 7              | 10.215                    | 2.898 - 14.932           | 3.32 (0.001)                  |                                            |

## C. Lesion cellular area (all lesions)

| Treatment*             | Number of mice | Median (mm <sup>2</sup> ) | Range (mm <sup>2</sup> ) | Z (P) (compared with Vehicle) | Z (P) (compared with Everolimus+Sorafenib) |
|------------------------|----------------|---------------------------|--------------------------|-------------------------------|--------------------------------------------|
| Vehicle                | 10             | 11.410                    | 5.512 - 42.884           |                               |                                            |
| Everolimus             | 10             | 1.984                     | 0.845 - 24.254           | 3.10 (0.002)                  | 1.46 (0.140)                               |
| Sorafenib              | 10             | 8.537                     | 2.112 - 20.408           | 1.06 (0.290)                  | 3.22 (0.001)                               |
| Everolimus + Sorafenib | 7              | 1.348                     | 0.583 - 2.382            | 3.42 (0.001)                  |                                            |

\* Treatment was started from 11 month old and continued for two months.
