# Supplementary material for: Combination of Everolimus with Sorafenib for Solid Renal Tumors in Tsc2+/− Mice Is Superior to Everolimus Alone
Source: PubMed Central journal article supplement — Neoplasia. 2017 Jan 13;19(2):112–20. doi: 10.1016/j.neo.2016.12.008 (PMC5238457; doi:10.1016/j.neo.2016.12.008), 2017-01-13
Supplement: mmc4.pdf [file mmc4.pdf]

**Supplemental Table 4 Comparison of solid tumours in *Tsc2*<sup>+/-</sup> mice by histological analysis**

(Wilcoxon rank-sum test)

**A. Lesion number (solid tumours)**

| Treatment*             | Number of mice | Median | Range  | Z (P) (compared with Vehicle) | Z (P) (compared with Everolimus+Sorafenib) |
|------------------------|----------------|--------|--------|-------------------------------|--------------------------------------------|
| Vehicle                | 10             | 4.0    | 1 - 13 |                               |                                            |
| Everolimus             | 10             | 3.0    | 0 - 4  | 1.65 (0.100)                  | 2.21 (0.020)                               |
| Sorafenib              | 10             | 2.5    | 0 - 9  | 0.61 (0.540)                  | 2.36 (0.020)                               |
| Everolimus + Sorafenib | 7              | 0.0    | 0 - 2  | 3.02 (0.003)                  |                                            |

**B. Lesion size (solid tumours)**

| Treatment*             | Number of mice | Median (mm <sup>2</sup> ) | Range (mm <sup>2</sup> ) | Z (P) (compared with Vehicle) | Z (P) (compared with Everolimus+Sorafenib) |
|------------------------|----------------|---------------------------|--------------------------|-------------------------------|--------------------------------------------|
| Vehicle                | 10             | 2.956                     | 0.786 - 19.314           |                               |                                            |
| Everolimus             | 10             | 0.940                     | 0 - 20.431               | 1.89 (0.060)                  | 1.70 (0.090)                               |
| Sorafenib              | 10             | 4.412                     | 0 - 29.989               | 0.23 (0.820)                  | 2.29 (0.020)                               |
| Everolimus + Sorafenib | 7              | 0.000                     | 0 - 0.999                | 3.14 (0.002)                  |                                            |

**C. Lesion cellular area (solid tumours)**

| Treatment*             | Number of mice | Median (mm <sup>2</sup> ) | Range (mm <sup>2</sup> ) | Z (P) (compared with Vehicle) | Z (P) (compared with Everolimus+Sorafenib) |
|------------------------|----------------|---------------------------|--------------------------|-------------------------------|--------------------------------------------|
| Vehicle                | 10             | 2.904                     | 0.593 - 18.520           |                               |                                            |
| Everolimus             | 10             | 0.900                     | 0 - 17.064               | 1.97 (0.052)                  | 1.70 (0.090)                               |
| Sorafenib              | 10             | 2.778                     | 0 - 11.233               | 0.38 (0.700)                  | 2.29 (0.020)                               |
| Everolimus + Sorafenib | 7              | 0.000                     | 0 - 0.999                | 2.85 (0.004)                  |                                            |

\* Treatment was started from 11 month old and continued for two months.
