# Supplementary material for: Combination of Everolimus with Sorafenib for Solid Renal Tumors in Tsc2+/− Mice Is Superior to Everolimus Alone
Source: PubMed Central journal article supplement — Neoplasia. 2017 Jan 13;19(2):112–20. doi: 10.1016/j.neo.2016.12.008 (PMC5238457; doi:10.1016/j.neo.2016.12.008), 2017-01-13
Supplement: mmc5.pdf [file mmc5.pdf]

**Supplemental Table 5 Effect of treatment on size and proliferation of renal tumour cells in *Tsc2*<sup>+/-</sup> mice**

(Wilcoxon rank-sum test)

**A. Size of tumour cells**

| Treatment*             | Number of tumours examined | Median ( $\mu\text{m}^2$ ) | Range ( $\mu\text{m}^2$ ) | Z (P) (compared with Vehicle) | Z (P) (compared with Everolimus+Sorafenib) |
|------------------------|----------------------------|----------------------------|---------------------------|-------------------------------|--------------------------------------------|
| Vehicle                | 25                         | 184.150                    | 152.070-214.594           |                               |                                            |
| Everolimus             | 25                         | 77.837                     | 52.238-119.970            | 6.063 (0.0001)                | 2.513 (0.0120)                             |
| Sorafenib              | 25                         | 165.110                    | 133.804-225.855           | 2.163(0.0305)                 | 6.063 (0.0001)                             |
| Everolimus + Sorafenib | 25                         | 66.554                     | 37.850-95.809             | 6.063 (0.0001)                |                                            |

**B. Percentage of tumour cells positive for Ki67**

| Treatment*             | Number of tumours examined | Median (%) | Range (%)     | Z (P) (compared with Vehicle) | Z (P) (compared with Everolimus+Sorafenib) |
|------------------------|----------------------------|------------|---------------|-------------------------------|--------------------------------------------|
| Vehicle                | 25                         | 18.784     | 10.268-32.155 |                               |                                            |
| Everolimus             | 25                         | 0.329      | 0.000-1.333   | 6.106 (0.0001)                | -0.339 (0.7340)                            |
| Sorafenib              | 25                         | 16.230     | 10.263-22.079 | 2.047 (0.0407)                | 6.105 (0.0001)                             |
| Everolimus + Sorafenib | 25                         | 0.167      | 0.000-2.119   | 6.106 (0.0001)                |                                            |

\* Treatment was started from 11 month old and continued for two months.
